# Supplementary material
Source: PubMed Central journal article supplement (PMC3188320)
Supplement: NIHMS61188-supplement-si20060510_062.pdf [file NIHMS61188-supplement-si20060510_062.pdf]

# Enterobactin Protonation and Iron Release: Structural Characterization of the Salicylate Coordination Shift in Ferric Enterobactin

*Rebecca J. Abergel,<sup>†</sup> Jeffrey A. Warner,<sup>‡</sup> David K. Shuh,<sup>‡</sup> and Kenneth N. Raymond<sup>†,‡,\*</sup>*

Contribution from the Department of Chemistry, University of California, Berkeley, CA 94720-1460  
and the Chemical Sciences Division, Lawrence Berkeley National Laboratory, Berkeley, CA 94720

raymond@socrates.berkeley.edu

## Supporting Information

<sup>†</sup>University of California, Berkeley

<sup>‡</sup>Lawrence Berkeley National Laboratory

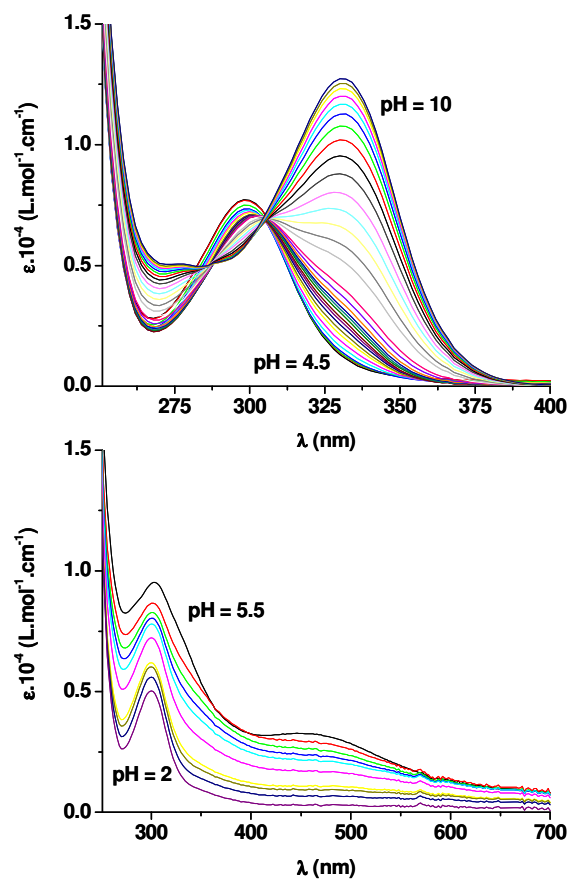

**Figure S1.** Spectrophotometric titrations of SERSAM by KOH (top) and  $[\text{Fe}^{\text{III}}(\text{SERSAM})]^0$  by HCl (bottom) in water.  $I = 0.1$  (KCl),  $T = 25.0$  °C,  $l = 1$  cm.

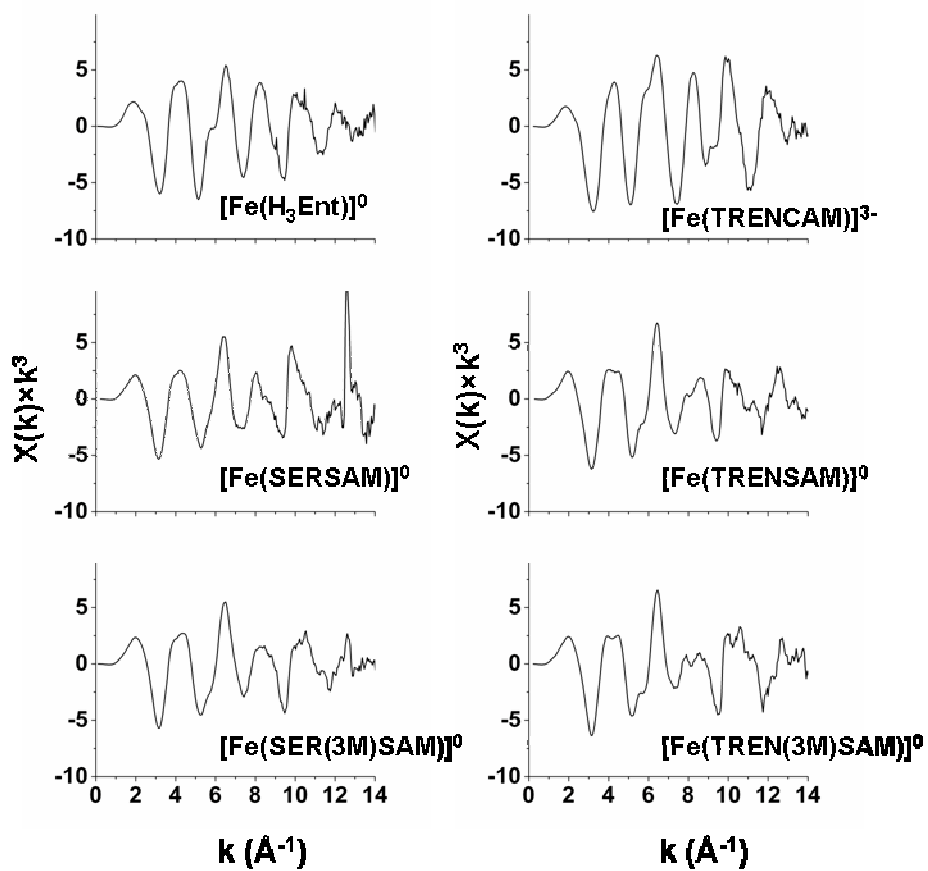

**Figure S2.** k-space spectra of the studied ferric complexes at 200 K.

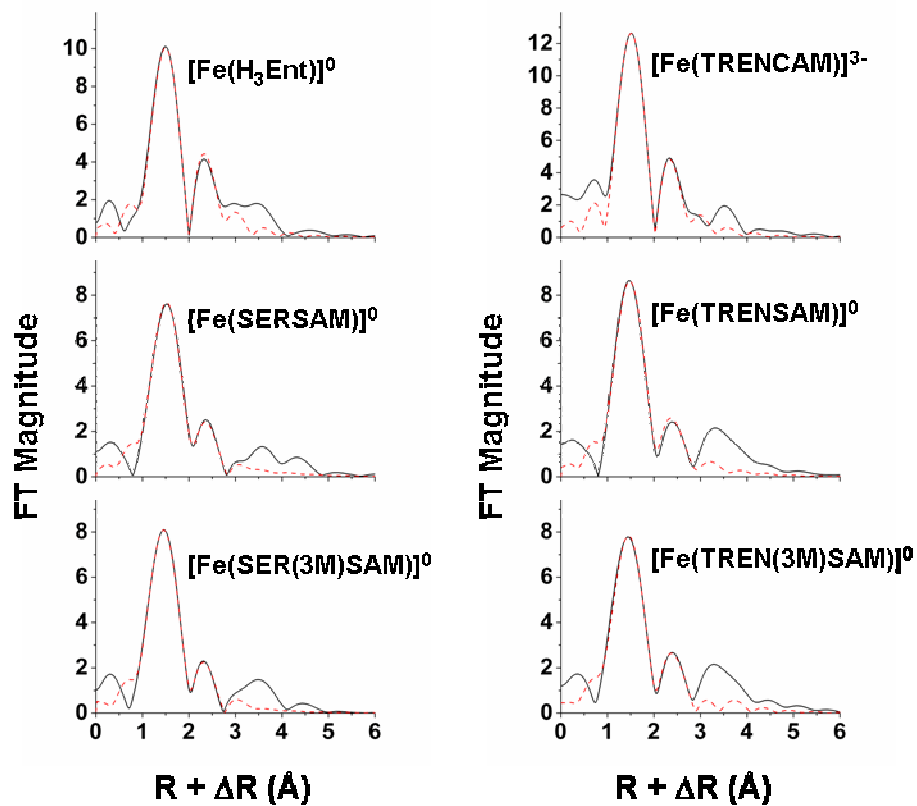

**Figure S3.** Fourier transforms (solid lines) and R-space fits (dashed lines) of the studied ferric complexes at 200 K.

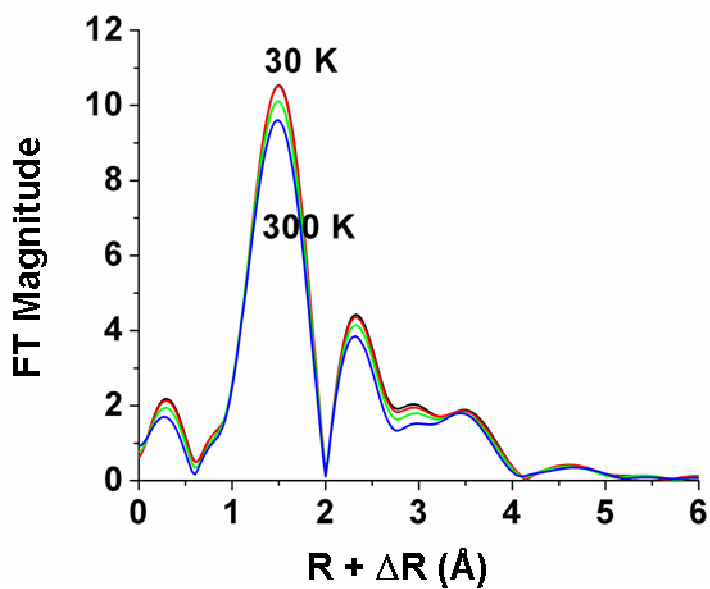

**Figure S4.** Fourier transforms temperature dependence for  $[\text{Fe}^{\text{III}}(\text{H}_3\text{Ent})]^0$ .

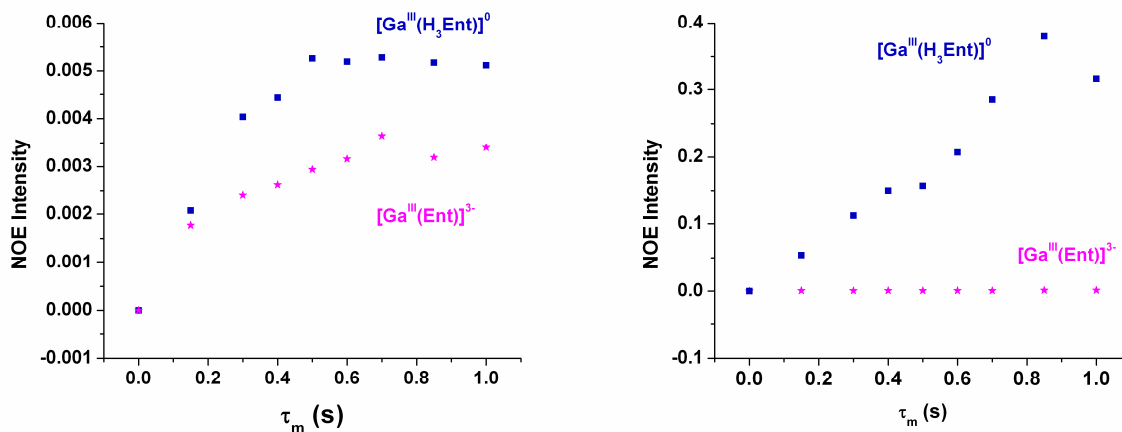

**Figure S5.** NOE intensities build up for the cross peaks between the amide proton and its two closest protons: the seryl  $\beta$ -proton ( $H_b$ , left) and the benzoyl *ortho*-proton ( $H_a$ , right).

| Complex                     | $N_{idp}$ | $N_{vp}$ | $R$ (30K) | $R$ (100K) | $R$ (200K) | $R$ (300K) |
|-----------------------------|-----------|----------|-----------|------------|------------|------------|
| $[Fe^{III}(Ent)]^{3-}$      | 18        | 6        | 6.0 %     | 6.3 %      | 6.1 %      | 6.4 %      |
| $[Fe^{III}(H_3ent)]^0$      | 18        | 6        | 12.1 %    | 11.9 %     | 11.5 %     | 10.7 %     |
| $[Fe^{III}(SERSAM)]^0$      | 18        | 6        | 5.4 %     | 3.9 %      | 3.4 %      | 4.7 %      |
| $[Fe^{III}(SER(3M)SAM)]^0$  | 18        | 6        | 5.1 %     | 5.3 %      | 5.4 %      | 5.8 %      |
| $[Fe^{III}(TRENCAM)]^{3-}$  | 18        | 6        | 10.1 %    | 10.2 %     | 10.5 %     | 10.0 %     |
| $[Fe^{III}(TRENSAM)]^0$     | 18        | 4        | 8.2 %     | 8.3 %      | 8.6 %      | 8.2 %      |
| $[Fe^{III}(TREN(3M)SAM)]^0$ | 18        | 6        | 6.3 %     | 5.8 %      | 5.8 %      | 5.4 %      |

**Table S1.** Fitting Parameters Used for EXAFS Spectral Analysis.<sup>a</sup>

<sup>a</sup>Number of independent parameters ( $N_{idp}$ ), variable parameters ( $N_{vp}$ ) and  $R$  factors for each studied complex. The  $R$  factors are averaged from at least two independent scans.

| Complex                                                   | $\Delta H$<br>(hartrees) | $\Delta H$<br>(kcal/mol) | Ga-O <sub>ortho</sub><br>distance (Å) | Ga-O <sub>meta</sub><br>distance (Å) | Ga-O <sub>carbonyl</sub><br>distance (Å) | Average Ga-O<br>length (Å) |
|-----------------------------------------------------------|--------------------------|--------------------------|---------------------------------------|--------------------------------------|------------------------------------------|----------------------------|
| [Ga <sup>III</sup> (Ent)] <sup>3-</sup>                   | -2450.775                | -3905555                 | 2.034                                 | 1.953                                | 6.211                                    | 1.993                      |
|                                                           |                          |                          | 2.029                                 | 1.953                                | 6.211                                    |                            |
|                                                           |                          |                          | 2.033                                 | 1.956                                | 6.200                                    |                            |
| cat-[Ga <sup>III</sup> (H <sub>3</sub> Ent)] <sup>0</sup> | -2452.536                | -3908361                 | 1.835                                 | 2.184                                | 5.947                                    | 2.010                      |
|                                                           |                          |                          | 1.835                                 | 2.185                                | 5.957                                    |                            |
|                                                           |                          |                          | 1.834                                 | 2.186                                | 5.945                                    |                            |
| sal-[Ga <sup>III</sup> (H <sub>3</sub> Ent)] <sup>0</sup> | -2452.551                | -3908385                 | 1.890                                 | 4.444                                | 2.009                                    | 1.951                      |
|                                                           |                          |                          | 1.893                                 | 4.443                                | 2.013                                    |                            |
|                                                           |                          |                          | 1.893                                 | 4.440                                | 2.010                                    |                            |

**Table S2.** Calculated Heats of Formation, Atomic Distances and Bond Lengths for Different Binding Modes of Gallic Enterobactin.

| Complex                                                   | NH-H <sub>b</sub> distance<br>(Å) | Average NH-H <sub>b</sub><br>distance (Å) | NH-H <sub>d</sub> distance<br>(Å) | Average NH-H <sub>d</sub><br>distance (Å) |
|-----------------------------------------------------------|-----------------------------------|-------------------------------------------|-----------------------------------|-------------------------------------------|
| [Ga <sup>III</sup> (Ent)] <sup>3-</sup>                   | 3.071                             | 3.063                                     | 4.456                             | 4.456                                     |
|                                                           | 3.052                             |                                           | 4.458                             |                                           |
|                                                           | 3.067                             |                                           | 4.456                             |                                           |
| cat-[Ga <sup>III</sup> (H <sub>3</sub> Ent)] <sup>0</sup> | 3.440                             | 3.438                                     | 4.448                             | 4.449                                     |
|                                                           | 3.438                             |                                           | 4.450                             |                                           |
|                                                           | 3.435                             |                                           | 4.448                             |                                           |
| sal-[Ga <sup>III</sup> (H <sub>3</sub> Ent)] <sup>0</sup> | 2.971                             | 2.972                                     | 1.956                             | 1.963                                     |
|                                                           | 2.972                             |                                           | 1.963                             |                                           |
|                                                           | 2.973                             |                                           | 1.969                             |                                           |

**Table S3.** Calculated Proton Distances for Different Binding Modes of Gallic Enterobactin.
